# Supplementary material for: MicroRNA expression profiling involved in doxorubicin-induced cardiotoxicity using high-throughput deep-sequencing analysis
Source: PubMed Central journal article supplement — Oncol Lett. 2021 May 26;22(1):560. doi: 10.3892/ol.2021.12821 (PMC8170198; doi:10.3892/ol.2021.12821), 2021-05-26

Figure S1. Morphology of H9c2 cells at different time points after Dox treatment. Representative images of the morphology of H9c2 cells (A) before Dox treatment or after (B) 12 or (C) 24 h of treatment with 5  $\mu\text{g/ml}$  Dox. Scale bar, 100  $\mu\text{m}$ . Dox, doxorubicin.

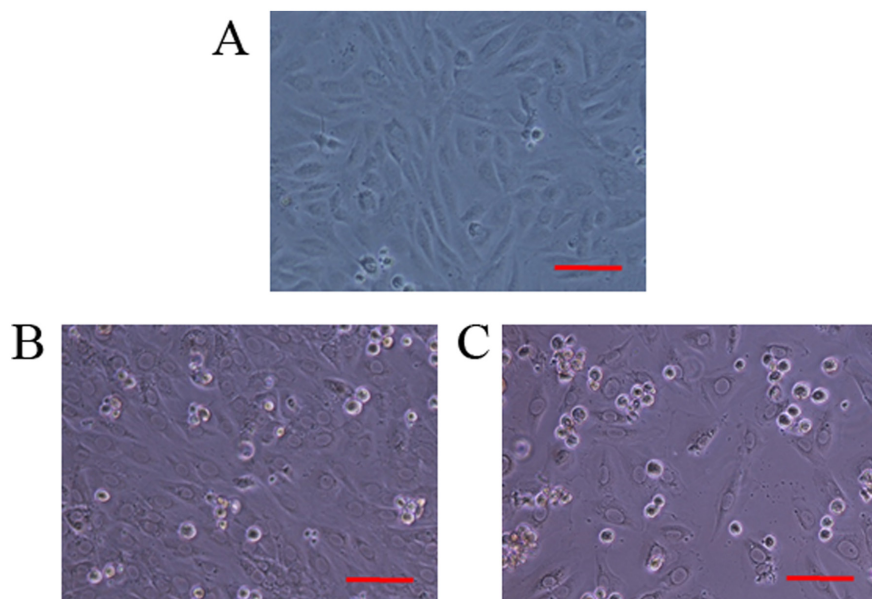

Figure S2. miRNA expression using RT-qPCR. Three miRNAs from two interaction networks were chosen, and their expression levels following doxorubicin treatment were (A) analyzed with deep sequencing and (B) confirmed using RT-qPCR. \* $P < 0.05$  and \*\* $P < 0.01$  vs. 0 h. RT-qPCR, reverse transcription-quantitative PCR; miR/miRNA, microRNA.

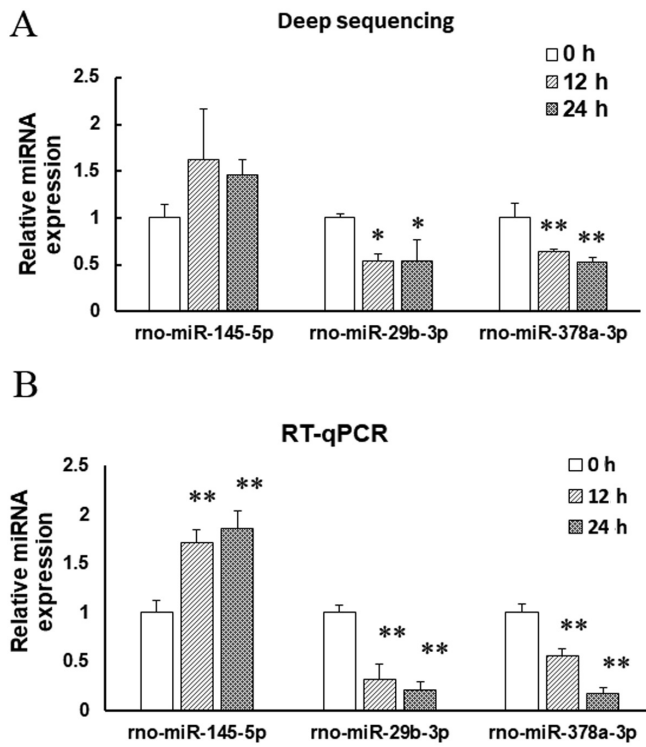

Supplement: Supplementary_Data1.pdf [file Supplementary_Data1.pdf]
